# Supplementary material
Source: PubMed Central journal article supplement (PMC1815233)
Supplement: pnas_0610945104_7.pdf [file pnas_0610945104_7.pdf]

**Table 1.** Average constraint force  $\bar{f}$ , taken at MD simulation time 6 ps and 10 ps. Forces are expressed in atomic units; the last column shows the root mean square fluctuation of the constraint force over 10 ps.

| $\text{\AA}$ | $\bar{f}$ at 6 ps | $\bar{f}$ at 10 ps | difference | RMS fluctuation |
|--------------|-------------------|--------------------|------------|-----------------|
| 3.8          | 0.00034           | 0.00046            | 1.2e-4     | 1.5e-4          |
| 4.0          | -0.00048          | -0.00083           | 3.5e-4     | 1.5e-4          |
| 4.2          | -0.00102          | -0.00100           | 0.2e-4     | 1.7e-4          |
| 4.4          | -0.00103          | -0.00089           | 1.4e-4     | 1.6e-4          |
| 4.8          | -0.00017          | -0.00005           | -1.2e-4    | 1.5e-4          |
| 5.0          | -0.00064          | -0.00099           | -3.5e-4    | 1.8e-4          |
| 5.2          | -0.00112          | -0.00159           | -4.7e-4    | 2.2e-4          |
| 5.4          | -0.00140          | -0.00136           | 0.4e-4     | 1.7e-4          |
| 5.6          | -0.00182          | -0.00181           | 0.1e-4     | 2.1e-4          |
| 5.8          | -0.00094          | -0.00104           | -0.9e-4    | 1.6e-4          |
