# Supplementary material
Source: PubMed Central journal article supplement (PMC1815233)

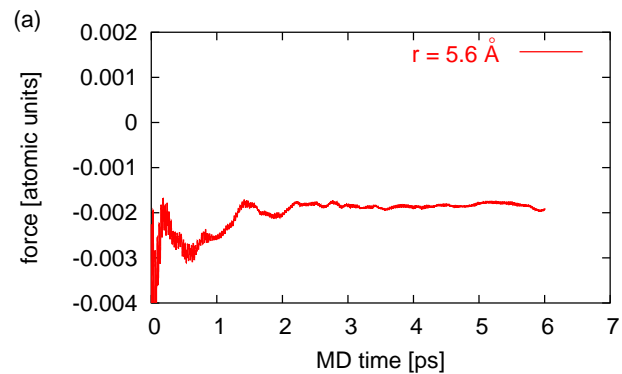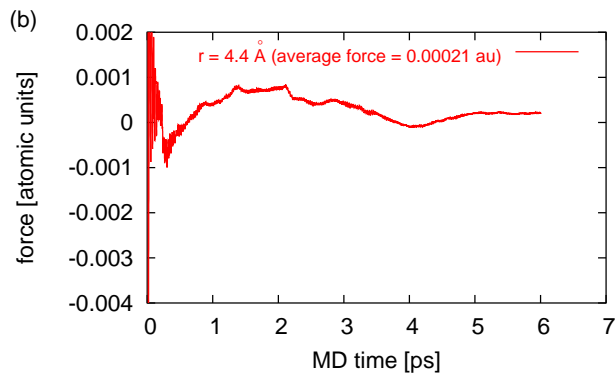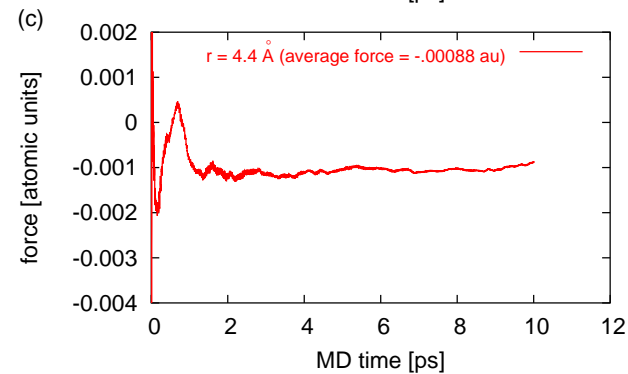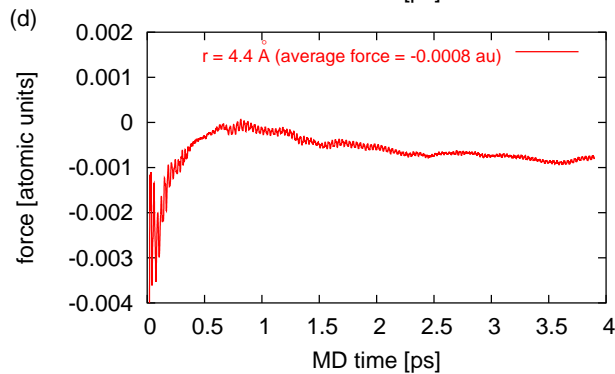

Supplement: pnas_0610945104_1.pdf [file pnas_0610945104_1.pdf]

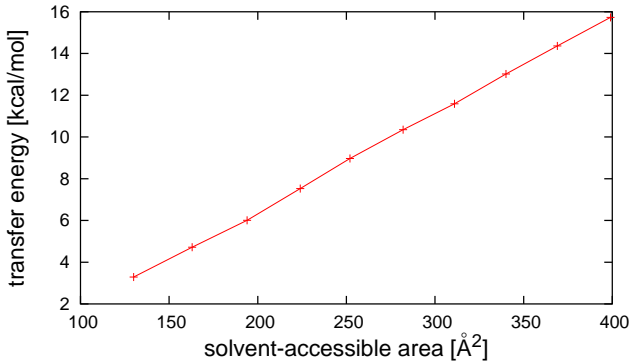

Supplement: pnas_0610945104_2.pdf [file pnas_0610945104_2.pdf]

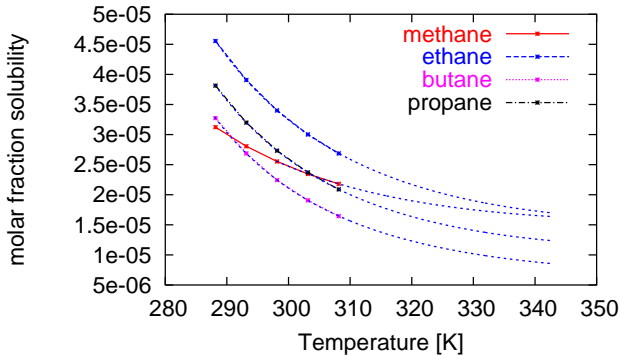

Supplement: pnas_0610945104_3.pdf [file pnas_0610945104_3.pdf]

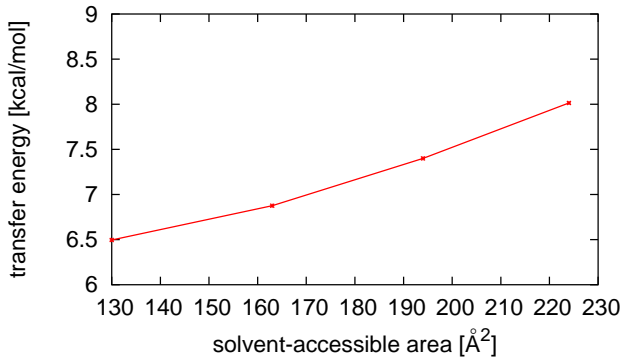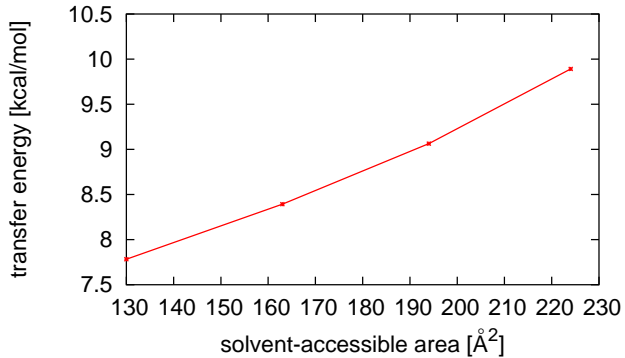

Supplement: pnas_0610945104_4.pdf [file pnas_0610945104_4.pdf]

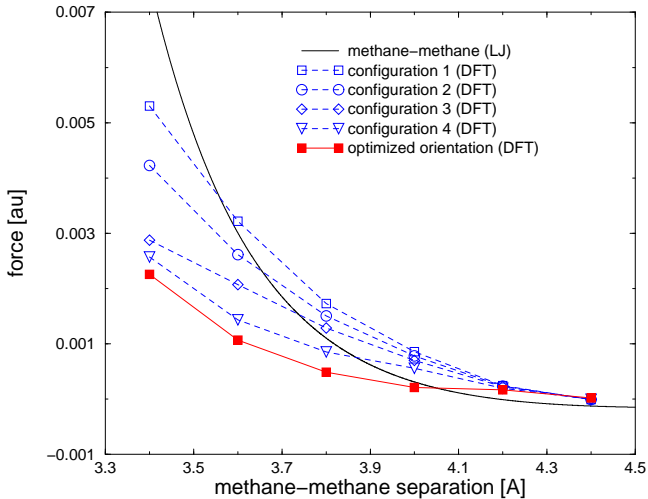

Supplement: pnas_0610945104_5.pdf [file pnas_0610945104_5.pdf]

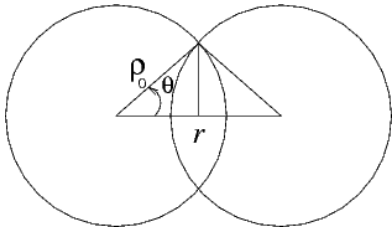

Supplement: pnas_0610945104_6.pdf [file pnas_0610945104_6.pdf]
